# Supplementary material for: Cell-fate plasticity, adhesion and cell sorting complementarily establish a sharp midbrain-hindbrain boundary
Source: Oxford University Press journal article supplement (doi:10.1242/dev.186882), 2020-05-21
Supplement: dev186882supp.pdf [file dev186882supp.pdf]

## Supplementary data

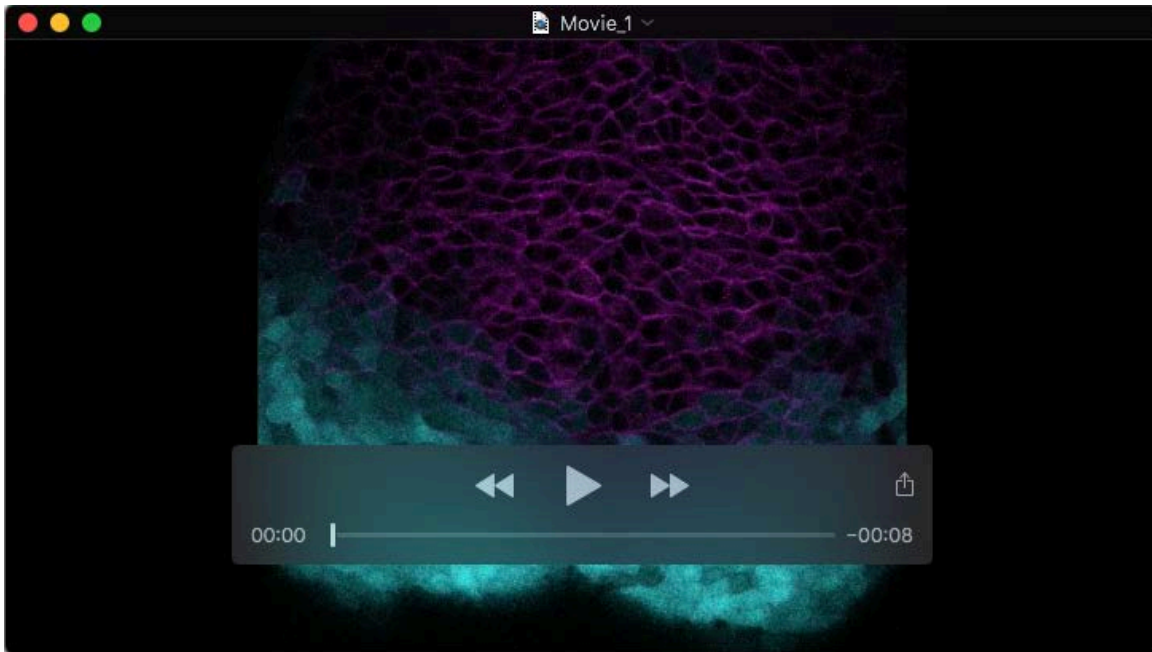

### Movie 1: Initially overlapping domains of *otx2b-gbx1*

Time-lapse imaging of *otx2*+(magenta) and *gbx1*+(cyan) cells in *otx2b:HRAS-mKate2* and *gbx1:Venus* reporter lines. Embryos were dorsally mounted with the anterior end to the top and imaged from 10.5 hpf to 15 hpf. Tissue sections spanning about 20µm were chosen with a z interval of 1 µm. Images were acquired at 2:30 (min:sec) intervals. Maximum intensity projections (covering 3 µm) of the fluorescent images are shown. Overlapping expression domains of *otx2b* and *gbx1* could be observed from the neural plate to the neural rod stages, as evidenced by the presence of cells that were positive for both mKate2 and Venus (double-positive).

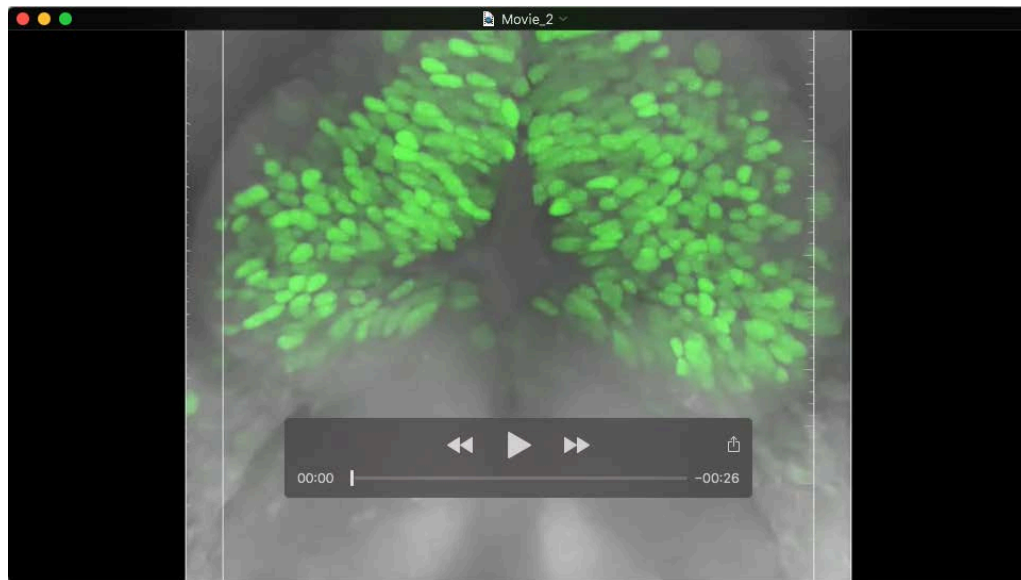

### Movie 2: Short-term lineage (temporary)tracing of *Otx2b*-derived cells

Time-lapse imaging of *otx2*-positive cells in the *otx2b:Venus-NLS* reporter line. Embryos were dorsally mounted with the anterior end to the top and imaged from 26 hpf to 32hpf. Tissue sections covering about 40µm were chosen with a z interval of 1 µm. Images were acquired at 2:30 (min:sec) intervals. Maximum intensity projections of the fluorescent images merged with transmitted light images are shown. Perdurance of the Venus fluorescent protein in the hindbrain domain (marked with a yellow circle) can be seen. An image file highlighting the region of interest (circle) was inserted within the movie subsequently using iMovie (10.1.13).

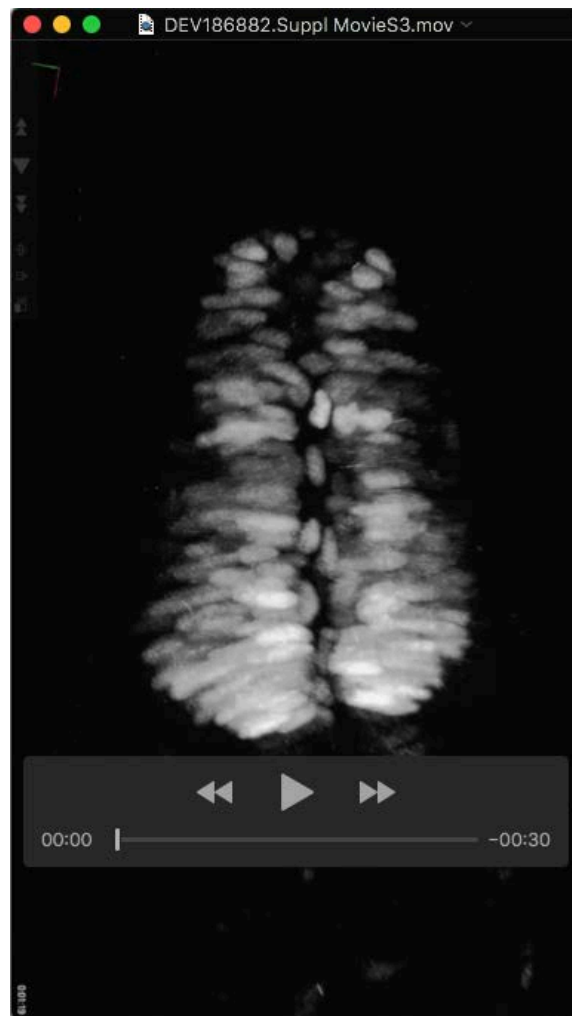

Movie 3: Short-term lineage tracing of *wnt1*-derived cells Time-lapse imaging of *wnt1*+cells (green) in the *wnt1:Venus-NLS* reporter line. Embryos were dorsally mounted with the anterior end to the top and imaged from 14 hpf to 26 hpf. Tissue sections spanning about 40µm were chosen with a z interval of 1 µm. Images were acquired at 2:30 (min:sec) intervals. Maximum intensity projections of the fluorescent images were merged with the transmitted light images and are shown. Perdurance of Venus fluorescent protein in the hindbrain domain (marked with arrow) can be observed. An image file highlighting the region of interest (arrow) was inserted at the beginning of the movie frame using iMovie (10.1.13).

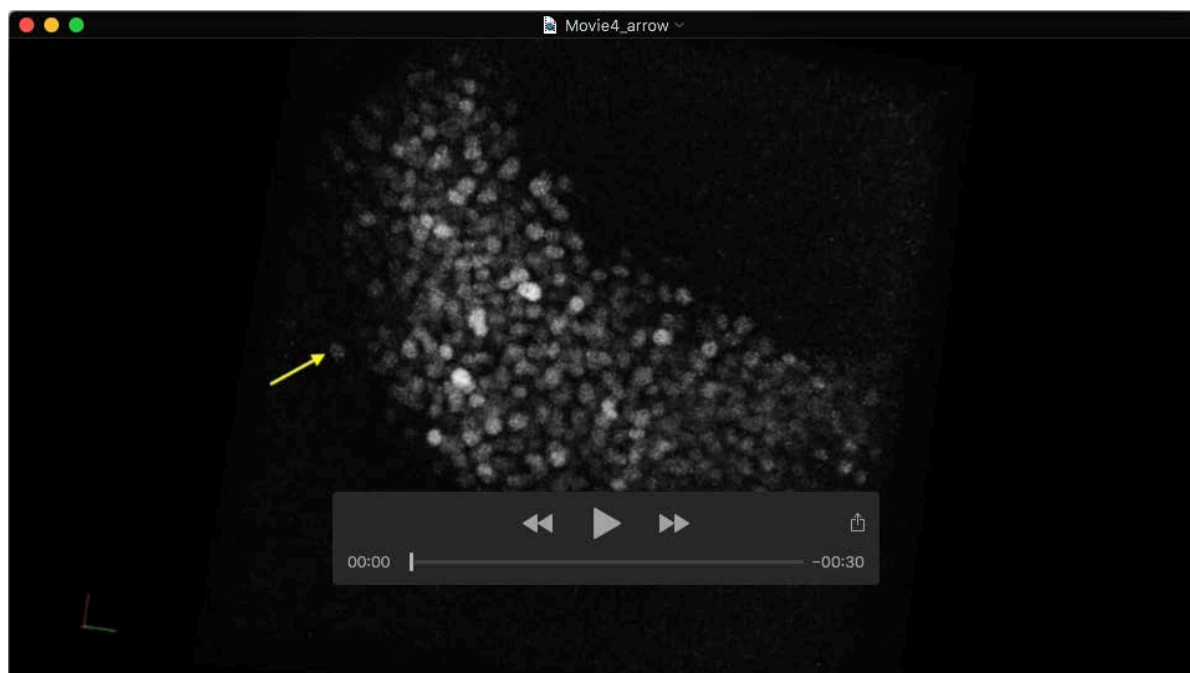

#### Movie 4: Cell sorting at the MHB

Time-lapse imaging of *wnt1*+cells in the *wnt1:Venus-NLS* reporter line (supporting movie file for images shown in Fig.5A). Embryos were dorsally mounted with the anterior end to the top and imaged from 10.5 hpf to 12 hpf. Tissue sections covering about 30µm were chosen with a z interval of 1 µm. Images were acquired at 2:30 (min:sec) intervals. Maximum intensity projection of images are shown. The movement of a straggling *wnt1*-cell (arrow) and its active migration towards the group of other boundary cells is shown. An image file highlighting the region of interest (arrow) was inserted at the beginning of the movie frame using iMovie (10.1.13).

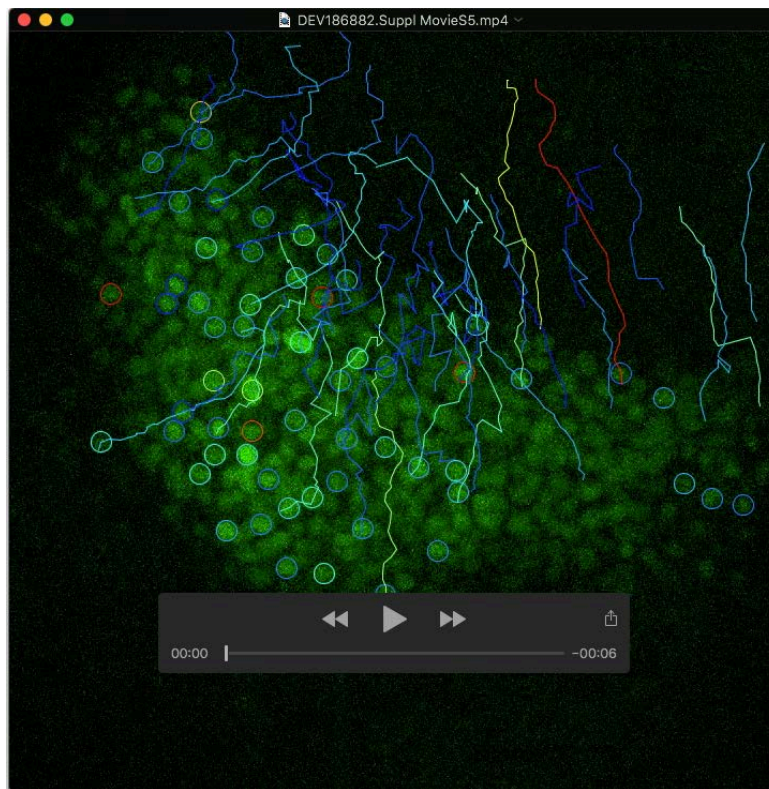

Movie 5: Cell tracking shows cell mixing within compartments This is the supporting movie file for images shown in Fig.5B. An analysis of cellular movement (shown in Movie 4) was performed using Trackmate-ImageJ (FIJI), which showed zig-zag movements and crossovers among many *wnt1*<sup>+</sup> cells (green).

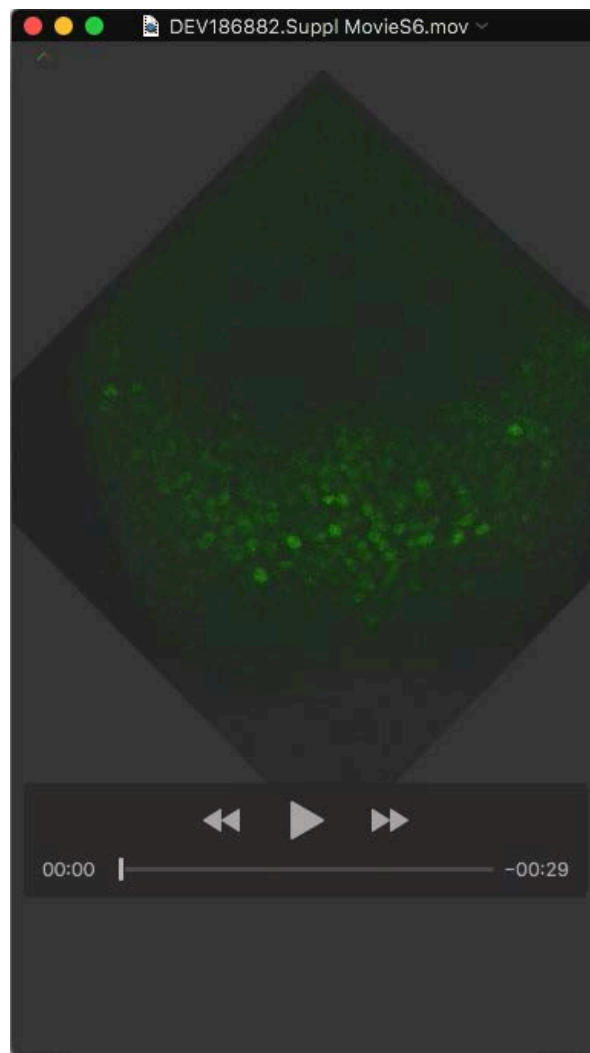

Movie 6: Time-lapse imaging of *wnt1*+(green) cells in the *wnt1:Venus-NLS* reporter line. This is an additional representative time-lapse movie depicting cell sorting behavior (arrow) at the MHB. An image file highlighting the region of interest (arrow) was inserted within the movie frame using iMovie (10.1.13).

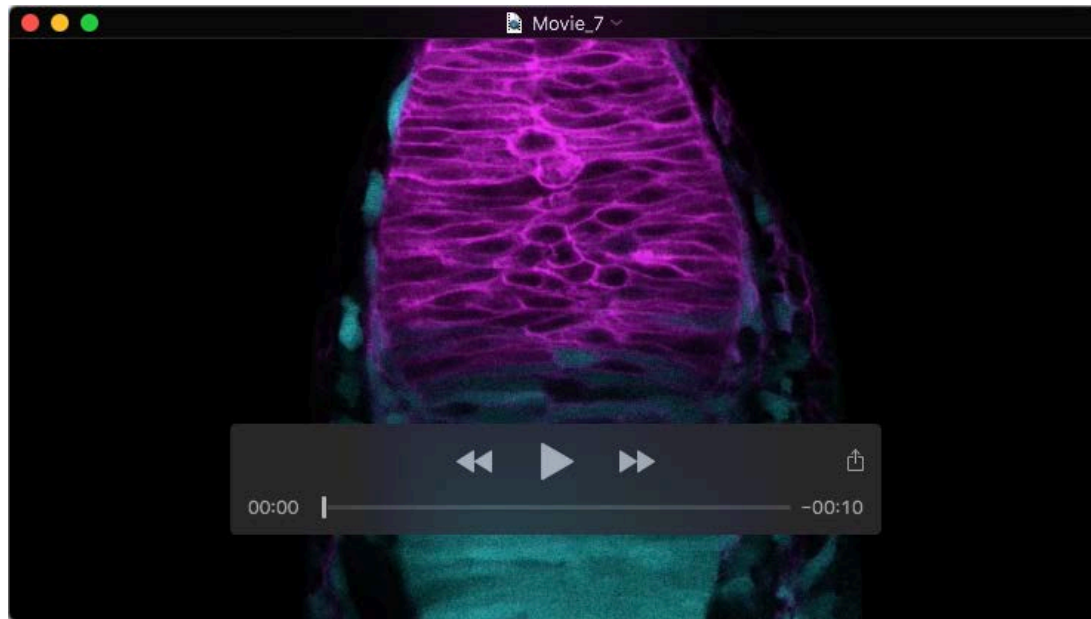

#### Movie 7:

A sequence of optical sections (z-sections,  $z = 1 \mu\text{m}$  interval, total  $40 \mu\text{m}$ ), acquired on the dorsal-ventral axis of the double transgenic fish, *otx2b:HRAS-mKate2* and *gbx1:Venus*, is shown. These are un-injected control fish at 14hpf. An overlapping *otx2* (magenta)-*gbx1* (cyan) domain, spanning a few cell layers, can be observed.



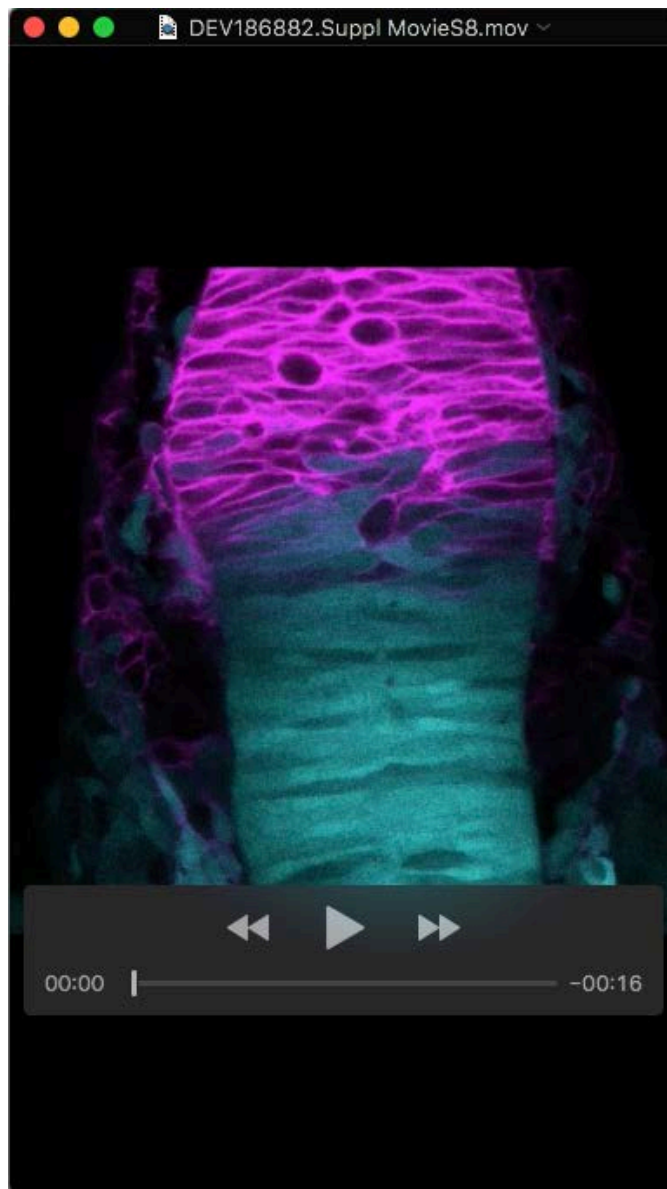

Movie 8: *otx2:HRAS-mKate2* and *gbx1:venus* (sol-efnb2a)

A sequence of optical sections (z-sections,  $z = 1 \mu\text{m}$  interval, total  $40 \mu\text{m}$ ), acquired on the dorsal-ventral axis of the double transgenic fish, *otx2b:HRAS-mKate2* (magenta)- and *gbx1:Venus* (green), is shown. These embryos expressed sol-efnb2a and were imaged at 14hpf. The overlapping *otx2b-gbx1* domain is irregular and larger than that seen in control fishes, and many *otx2b*-positive (single-positive) cells could be observed far from the Otx-Gbx overlapping domain.



Figure S1

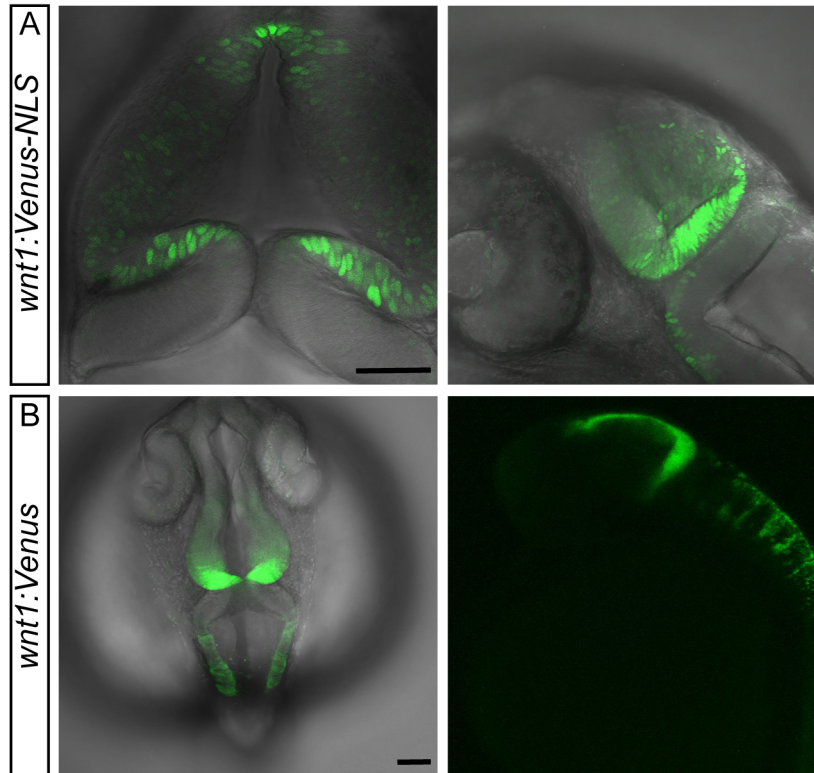

Fig S1: Identical reporter expression in *wnt1:Venus-NLS* and *wnt1:Venus* transgenic line

(A and B) Live imaging show identical expression patterns of Venus fluorescent protein (nuclear (*venus-NLS*) and cytoplasmic (*venus*)) in two independent transgenic line. Both dorsal and lateral views are provided for better clarity. Scale bar 20µm.

Figure S2

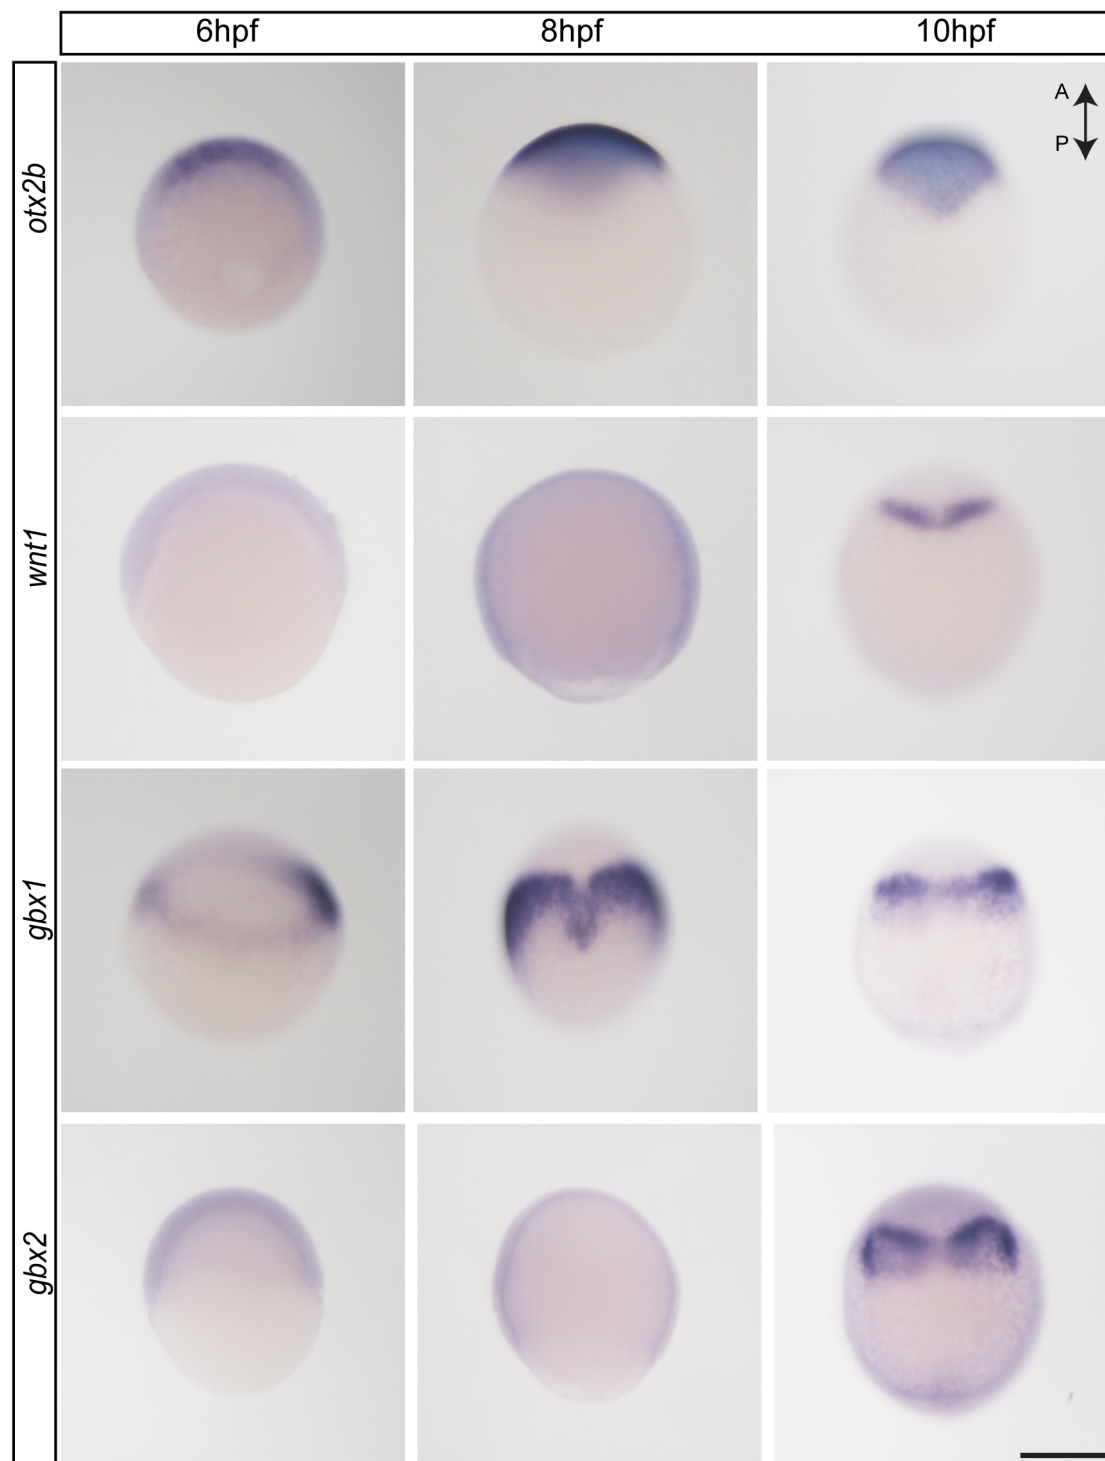

Fig S2: *in situ* hybridization showing onset of gene expression.

Whole mount *in situ* hybridization in embryos at 6, 8, and 10hpf for midbrain markers, namely *otx2b* and *wnt1*, and hindbrain markers *gbx1* and *gbx2*, show that both *otx2* and *gbx1* show an early onset (6hpf) compared to *wnt1* and *gbx2*, which show late onset (10hpf) of gene expression. The anterior-posterior axis of the embryo is marked with A-P and an arrow. Scale bar 200μm.



Figure S3

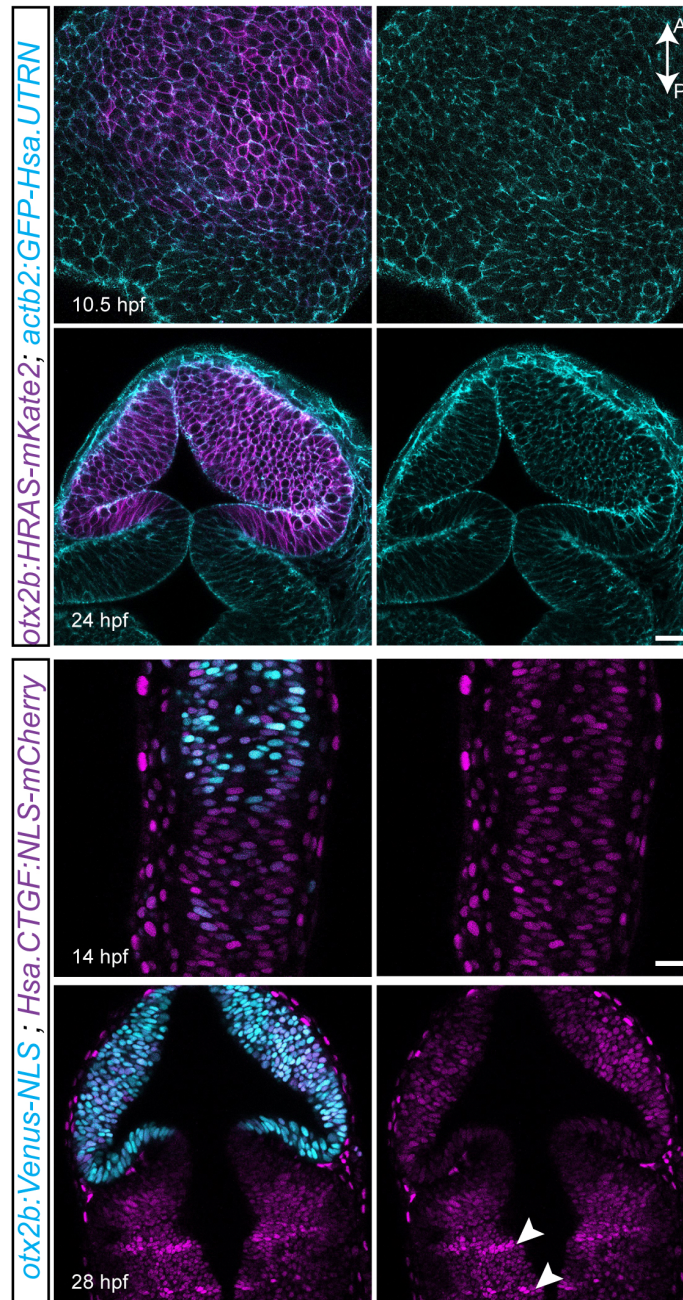

Fig S3: F-actin and Yap signaling atMHB

The F-actin transgenic reporter fish were combined with *Otx2b* reporter (*otx2b:HRAS-mKate2; actb2GFP\_Hsa.UTRN*). Double transgenic embryos were dorsally mounted and imaged at 10.5 hpf and 24 hpf. No obvious actin belt structures could be observed at the *otx2b* boundary. Similarly, active Yap signaling reporter *Has.CTGF:NLS-mCherry*, in combination with *otx2b*, did not show any significant mCherry signal at the MHB. In contrast, boundary cells in the rhombomeres showed a strong mCherry signal (arrowheads) as expected. The anterior-posterior axis of the embryo is marked with A-P and an arrow. Scale bar 20μm.

**Table S1. List of CRISPR/Cas9 target site and primer sequences for generating bait plasmids**

| Gene               | Target site with PAM (underlined)                              | Primers used for bait generation                                    |
|--------------------|----------------------------------------------------------------|---------------------------------------------------------------------|
| <i>otx2</i>        | GGAACCCGGCTAATTGTCTC <u>AGG</u>                                | F:<br>GGGTGACGCTGAACTTATGTTCCACC<br>R:<br>TTTACCCCCCACAACCATCTTTAGC |
| <i>gbx1</i>        | GGTTATCCTGGCGCTGCTGT <u>AGG</u>                                | F: TTAATTCTCCCCTATTTTATAAGC<br>R: GGTGAACTGAGCGCGGTCTGGTC           |
| <i>wnt1</i>        | GGAGGGAGGAAAAAACAGAG <u>GGG</u>                                | F: ACACGAGGAATCTCTGGACG<br>R: GCACACACTGTCAGATATAGCC                |
| <i>gbx2</i>        | GGCGCGGCCAGAGCTCATGGT <u>TGG</u>                               | F: TGCAAACACTCTGACCATACT<br>R: GTCCTGAAGTCTGGGAGAAGC                |
| <i>fgf8a</i>       | GGACAGCTCGGGATTTCTC <u>GGG</u>                                 | F: AGCCTTGCACAATAGCCTCG<br>R: TCAGGTTTTCCAGCTCAAATGT                |
| <i>N-cad(cdh2)</i> | AACGATGTACCGTTCCGG <u>AGG</u><br>CTCGTTCTCGGTGAAACC <u>AGG</u> |                                                                     |

**Table S2. List of CRISPR/Cas9-mediated knock-in lines and transgenic zebrafish lines used in this study**

| Strain                                                | Source                          | ZFIN Identifier    |
|-------------------------------------------------------|---------------------------------|--------------------|
| <i>Tg(otx2b:Venus)</i>                                | Kesavan et al., 2017            | <i>tud40Tg(AB)</i> |
| <i>Tg(otx2b:Venus-NLS)</i>                            | This study; Träber et al., 2019 | N/A                |
| <i>Tg(otx2b:mKate2)</i>                               | This study                      | N/A                |
| <i>Tg(gbx1:Venus)</i>                                 | This study                      | N/A                |
| <i>Tg(wnt1:Venus-NLS)</i>                             | This study                      | N/A                |
| <i>Tg(wnt1:Venus)</i>                                 | This study                      | N/A                |
| <i>Tg(gbx2:Venus-NLS)</i>                             | This study                      | N/A                |
| <i>Tg(dusp6:d2egfp)</i>                               | Molina et al., 2007             | <i>Pt10Tg</i>      |
| <i>Tg(otx2b:CreERT2)</i>                              | Kesavan et al., 2018            | <i>tud44Tg(AB)</i> |
| <i>Tg(fgf8a:CreERT2)</i>                              | This study                      | N/A                |
| <i>Tg(hsp70l:loxP-DsRed- loxP-EGFPNLS)</i>            | Knopf et al., 2011              | <i>tud9Tg</i>      |
| <i>Tg(ubb:lox2272-loxp-RFP-lox2272-CFP- loxp-YFP)</i> | Pan et al., 2013                | <i>a131Tg</i>      |
| <i>Tg(actb2:GFP-Hsa.UTRN)</i>                         | Behrndt et al., 2012            | <i>e116Tg</i>      |
| <i>Tg(Hsa.CTGF:NLS-mCherry)</i>                       | Astone et al., 2018             | <i>la49Tg</i>      |

**Table S3. Other reagents**

| Reagent                                | Source                    | Identifier                 |
|----------------------------------------|---------------------------|----------------------------|
| pCS2:HRAS-mKate2                       | Weber et al., 2014        | N/A                        |
| pBut2:sol-efnb2a                       | Cavodeassi et al., 2013   | N/A                        |
| <i>Hsp70l:loxP_nonFP_loxp_Cas9eGFP</i> | This study                | N/A                        |
| N-cad ( <i>cdh2</i> ) (morpholino)     | TCTGTATAAAGAAACCGATAGAGTT | ZDB-MRPHLNO-060815-1(ZFIN) |
